# Supplementary material for: Reduced expression of glycolate oxidase leads to enhanced disease resistance in rice
Source: PubMed Central journal article supplement (PMC3628735; doi:10.7717/peerj.28), 2013-02-12
Supplement: peerj-01-28-s001.pdf [file peerj-01-28-s001.pdf]

|      |      |                                                              |      |
|------|------|--------------------------------------------------------------|------|
| GLO3 | 1136 | CGCCAGCTGGACTACGTCCC GCCACCATCAGCGCCCTCGAGGAGGTTGTGAAGGCGGC- | 1194 |
| GLO1 | 967  | GCG-GGGC-GCATCCCGGTGTACCTCGACGGCGGCGTCCGCCGCGGCACCGACGTCTTCA | 1024 |
| GLO3 | 1195 | TCGCGGGCAGC-TCCCCGTCTTCCTCGACGGCGGCGTCCGCCGCGGCACCGACGTCTTCA | 1253 |
| GLO1 | 1025 | AGGCGCTCGCCCTCGGCGCCGCCGGCGTCTTCATCGGGAGGCCGGTGGTGTTCGCGCTGG | 1084 |
| GLO3 | 1254 | AGGCGCTCGCCCTCGGCGCCGCCGGCGTCTTCATCGGGAGGCCGGTGGTGTTCGCGCTGG | 1313 |
| GLO1 | 1085 | CGGCGGAGGGGGAGGCCGGGGTGAGGAACGTGCTGCGGATGATGCGGGAGGAGTTCGAGC | 1144 |
| GLO3 | 1314 | CGGCGGCGGGGGAGGCCGGAGTCCGGAACGTGCTGCAGATGCTCCGCGACGAGTTCGAGC | 1373 |
| GLO1 | 1145 | TCACCATGGCGCTCAGCGGATGCACCTCGCTCGCCGACATCACCCGCGCCACATC-TAC  | 1203 |
| GLO3 | 1374 | TCACCATGGCGCTCAGCGGCTGCACCTCCCTCGCCGACATCACCCGCAACCACGTCAT-C | 1432 |
| GLO1 | 1204 | ACCGACGCCGAC                                                 | 1215 |
| GLO3 | 1433 | ACCGAGGCCGAC                                                 | 1444 |

**B. GLO1 vs GLO4**

|      |      |                                                               |      |
|------|------|---------------------------------------------------------------|------|
| GLO1 | 775  | TGGAAGGATGTGA-AGTGGCTGC-AGAGCATCACGTC-GC-TGCCGATC-CTCGTCAAGG  | 829  |
| GLO4 | 711  | TGGAAGGATAT-AGAGTGGCT-CAAGTCCATAAC--CAGCATGCCGATCTTTC-TCAAGG  | 765  |
| GLO1 | 830  | GCGTCATCACCGCGGAGGATGCGAGGCTG-GCCGTGCACTCCGGCGCGG-CGGGGATCAT  | 887  |
| GLO4 | 766  | GCATCGTCAACCGCTGAGGACGCGAGG-AGAGCAGTGGAGGCCGGGGTGGCCGGCG-TGAT | 823  |
| GLO1 | 888  | CGTGTGCAACCACGGCGCGCGGCAGCTGGACTACGTC-CCGGCGACCATCAGC-GCCCTG  | 945  |
| GLO4 | 824  | CGTCTCCAACCACGGCGCGCGGCAGCTGGACTACG-CGCCGGCGACCATC-GCCGCCCTG  | 881  |
| GLO1 | 946  | GAGGAGGTGGTCACGGCGGCGGGGGCGCA-TCCCGGTG-TACCTCGACGGCGGGCGTCC   | 1003 |
| GLO4 | 882  | GAAGAGGTGGTCAGGGCGGTGGCCGG-CGCCGTGCCGGTGGTGG-TCGACGGCGGAATCC  | 939  |
| GLO1 | 1004 | GCCGCGGCACCGACGTCTTCAAGGCGCTCGCCCTCGGCGC-CGCCGGCG-TCTTCATCGG  | 1061 |
| GLO4 | 940  | GGCGAGGCACTGACGTGTTCAAGGCCCTGGCGCTCGGCGCACG--GGCGGTCATGGTTGG  | 997  |
| GLO1 | 1062 | GAGGCCGGTGGTGTTCGCGCTGGCGGCGGAGGGG-AGGCCGGGGTGAGGAACGTGCTGC   | 1120 |
| GLO4 | 998  | GAGGCCGGTGTTCCTTCGGGCTGGCGGCG-AGGGGGAGGCAGGCGGAGGCACGTGAT-C   | 1055 |
| GLO1 | 1121 | G-GATGATG--CGGGAGGAGTTCGAGCTCACCATGGCGCTCAGCGGATGCACCTCGC-TC  | 1176 |
| GLO4 | 1056 | GAGATGCTCAACGGC-G-AGCTGGAGGTGGCCATGGCGCTCTGCGGCTGC-CGGAGCGTC  | 1112 |
| GLO1 | 1177 | GCCGACATCACCCGC-GCC                                           | 1194 |
| GLO4 | 1113 | GGCGAGATCACCCGCAGCC                                           | 1131 |
